# Supplementary material
Source: publisher figshare collection journal article supplement (https://acs.figshare.com/ndownloader/files/9529465)
Supplement: Supplementary file 1 [file 9529465]

## Supporting Information

### Functionalized Fe<sub>3</sub>O<sub>4</sub>@C nanospheres with adjustable structure for efficient hexavalent chromium removal

Linglin Zhou,<sup>†,‡</sup> Guilong Zhang,<sup>†,||</sup> Jie Tian,<sup>‡</sup> Dongfang Wang,<sup>†,‡</sup> Dongqing Cai,<sup>\*,†,||</sup>

Zhengyan Wu<sup>\*,†,||</sup>

<sup>†</sup>*Key Laboratory of High Magnetic Field and Ion Beam Physical Biology, Hefei Institutes of Physical Science, Chinese Academy of Sciences, 350 Shushanhu Road, Hefei 230031, People's Republic of China*

<sup>‡</sup>*University of Science and Technology of China, No. 96 Jinzhai Road, Hefei 230026, People's Republic of China*

<sup>||</sup>*Key Laboratory of Environmental Toxicology and Pollution Control Technology of Anhui Province, Hefei Institutes of Physical Science, Chinese Academy of Sciences, 350 Shushanhu Road, Hefei 230031, People's Republic of China*

*\*D.C. Email: dqcai@ipp.ac.cn.*

*\*Z.W. Email: zywu@ipp.ac.cn.*

**Number of Tables: 1**

**Number of Figures: 1**

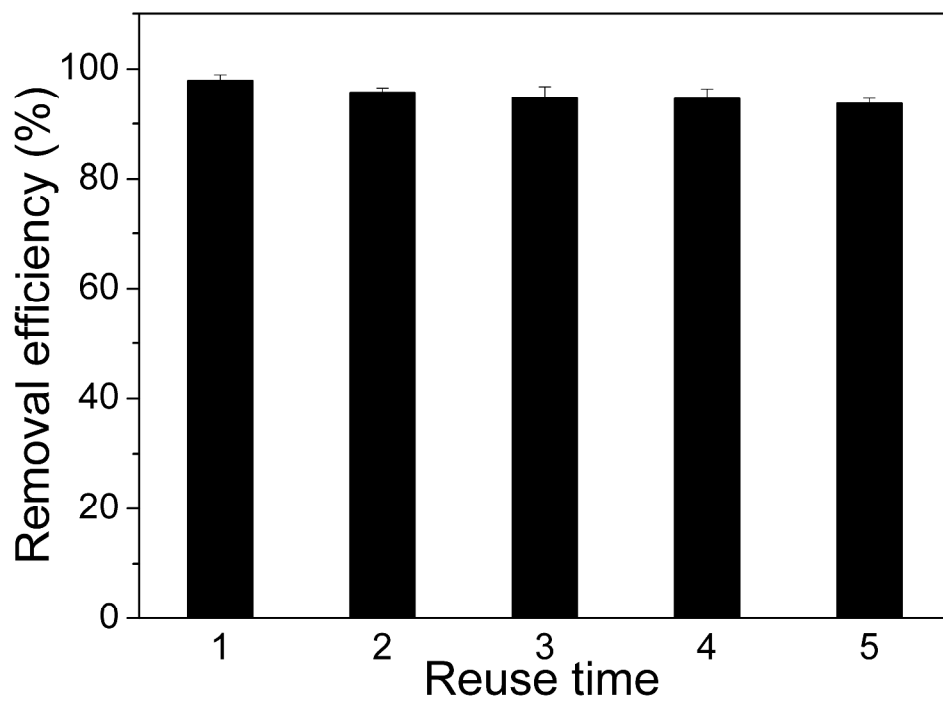

Figure S1. Reuse performance of Fe<sub>3</sub>O<sub>4</sub>@C-4 on Cr(VI) removal.

Table S1. Pore volume and size of different samples.

| Samples                             | Pore volume (cm <sup>3</sup> /g) | Pore radius (nm) |
|-------------------------------------|----------------------------------|------------------|
| Fe <sub>3</sub> O <sub>4</sub> @C-1 | 0.078                            | 1.5679           |
| Fe <sub>3</sub> O <sub>4</sub> @C-2 | 0.106                            | 1.5674           |
| Fe <sub>3</sub> O <sub>4</sub> @C-3 | 0.056                            | 1.5705           |
| Fe <sub>3</sub> O <sub>4</sub> @C-4 | 0.060                            | 3.506            |
